# Supplementary material for: Supporting Local Implementation of the European Green Deal through a Place-Based, Participatory Approach: Methodology for a Comprehensive Analytical Framework
Source: MDPI journal article supplement (doi:10.3390/su152015098), 2023-10-20
Supplement: s1 [file s1]

Archive with 1 entries (1 files):
- sustainability-2628863-supplementary.pdf
