# Supplementary material for: Supporting Local Implementation of the European Green Deal through a Place-Based, Participatory Approach: Methodology for a Comprehensive Analytical Framework
Source: MDPI journal article supplement (doi:10.3390/su152015098), 2023-10-20
Supplement: s1 [file s1 › sustainability-2628863-supplementary.pdf]

# Morphology and natural resources

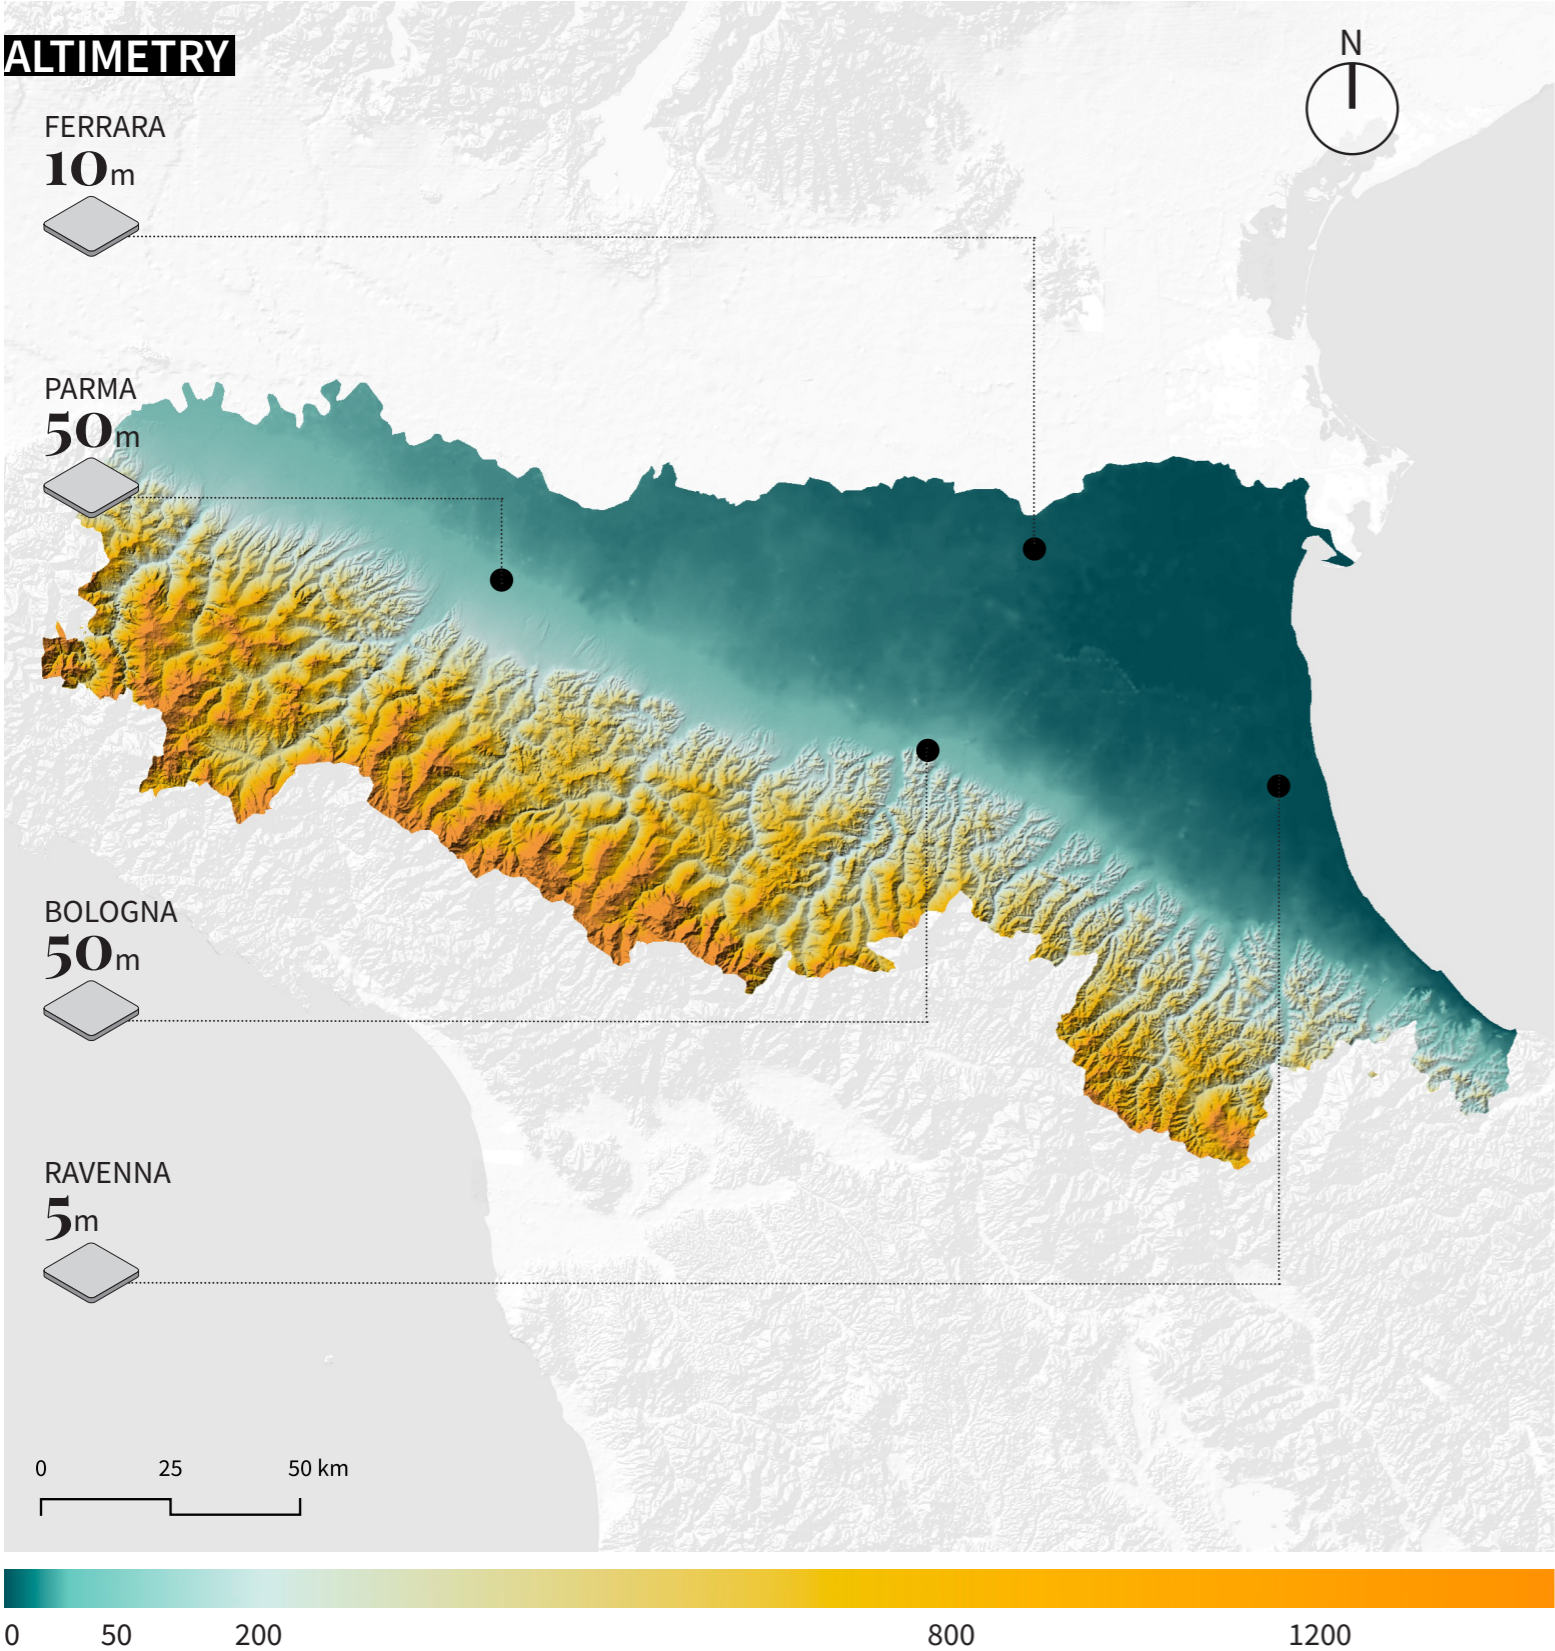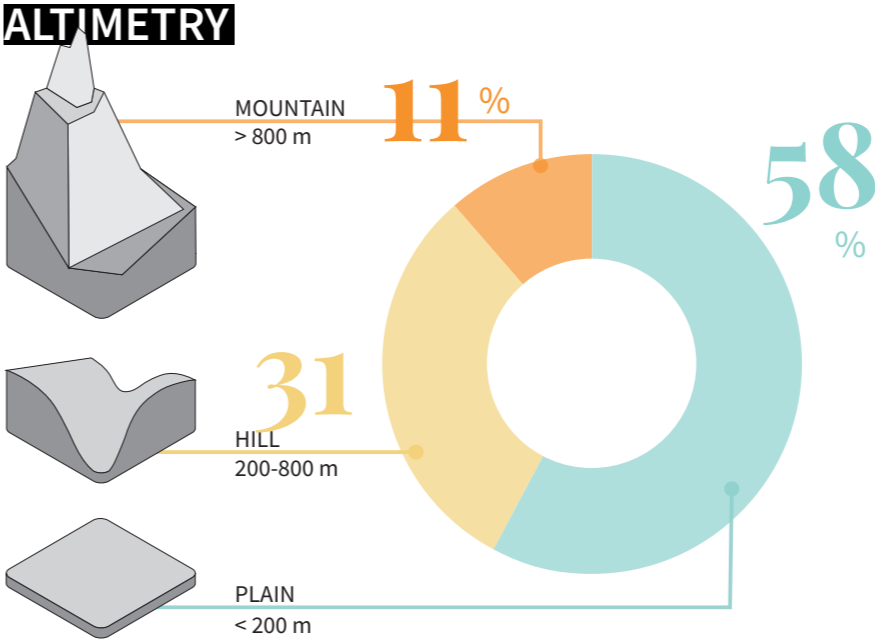

### PROTECTED AREAS

Where are protected areas mainly located in **Emilia Romagna**?

#### LOCATION BY ALTIMETRY (%)

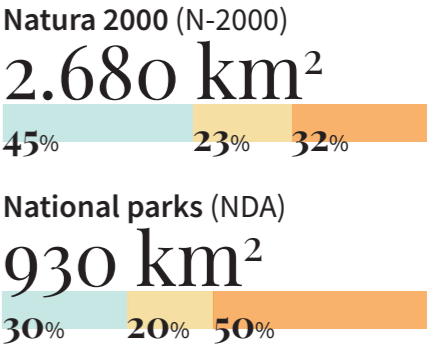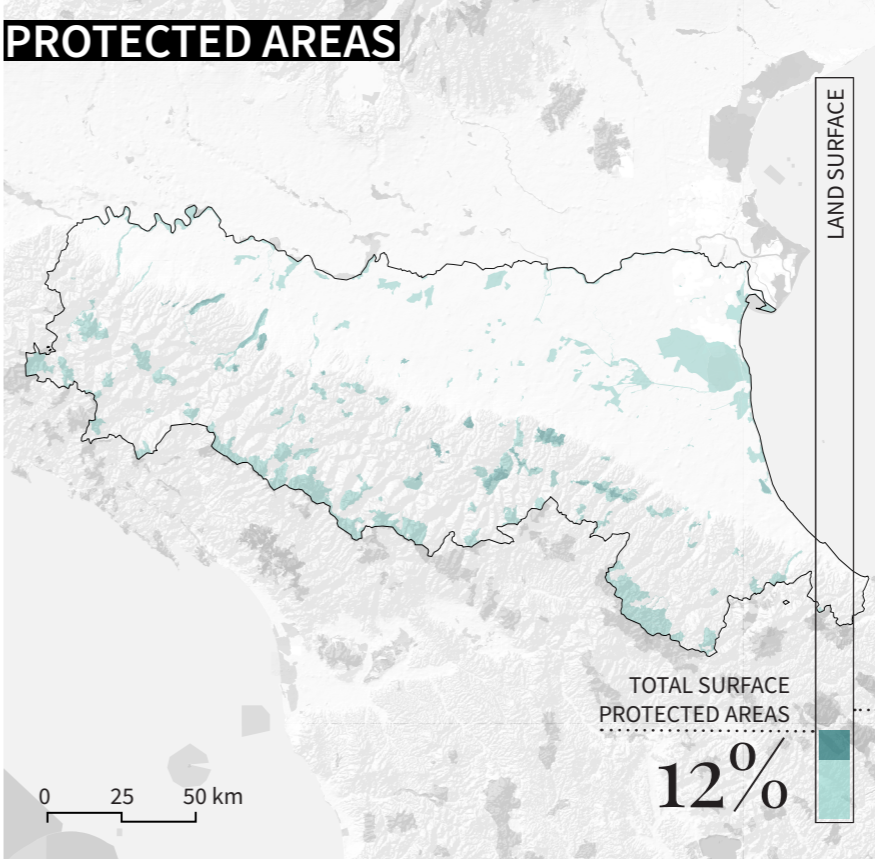

The map represent all the **Nationally Designated Areas** (NDA) such as national or regional parks and the **Natura 2000** (N-2000) areas.

These (regulated by State's and by the European Union's under the Birds (1979) and Habitat (1992) Directives) are key assets to protect Europe's biodiversity.

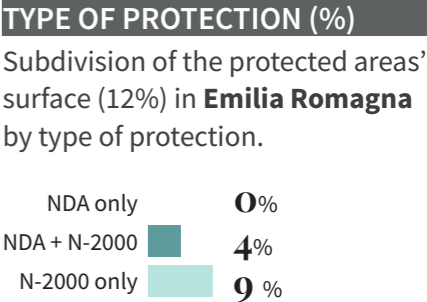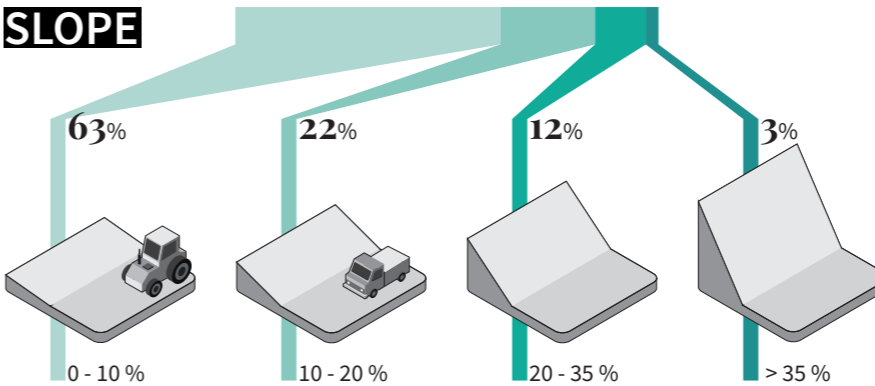

#### NATURA 2000 (%)

Subdivision by Bird and Habitat Directives on land surface.

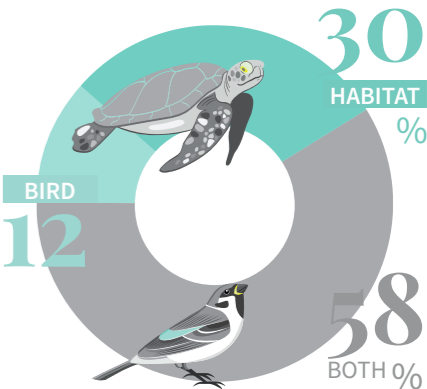

# Environment and climate

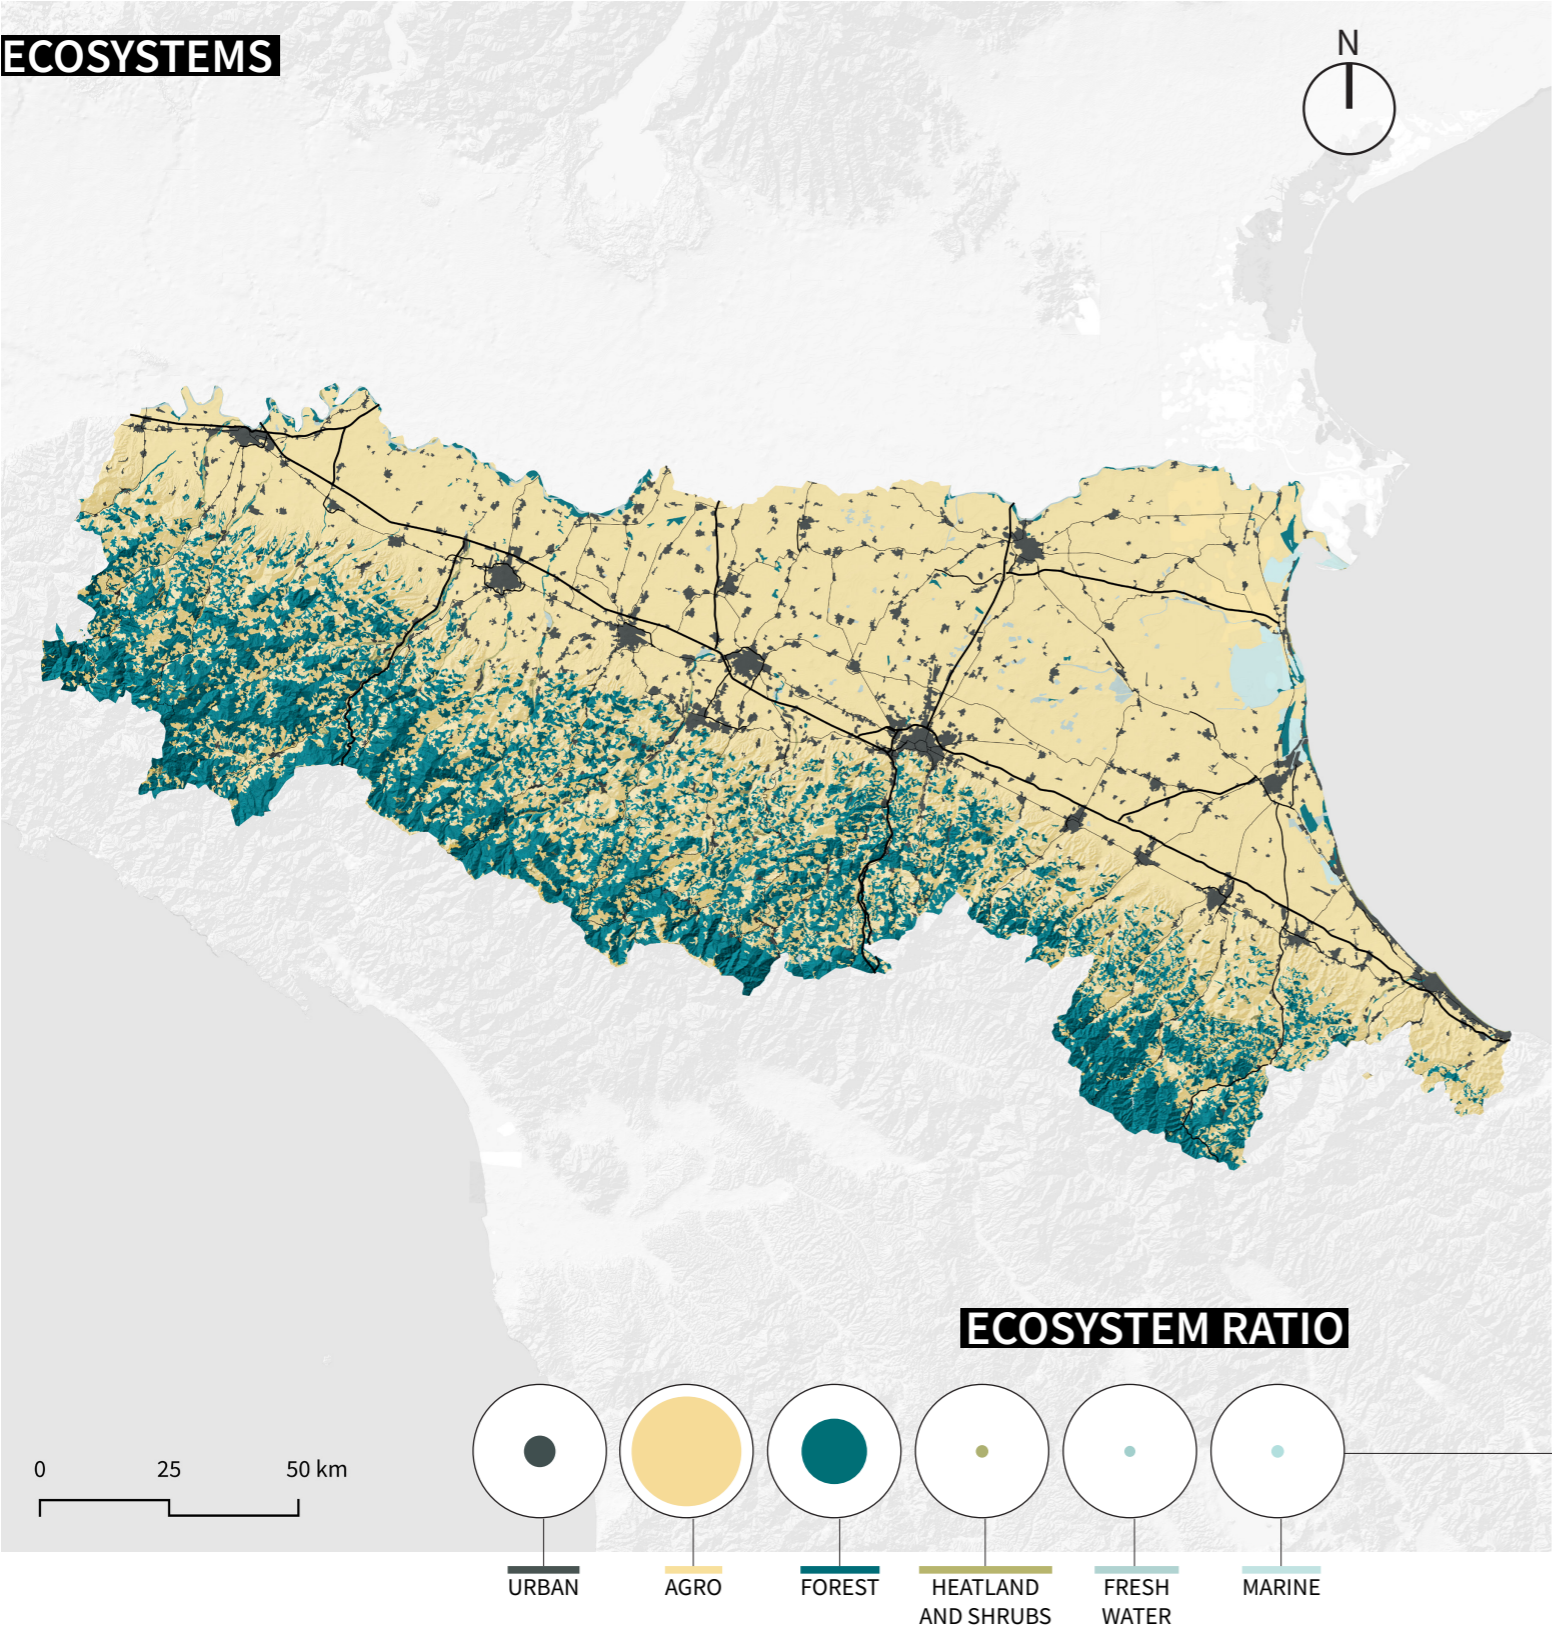

The aim of the LANDSCAPE AND URBANISATION map is to show the sealed soil, consumed by urbanisation (orange), in relation not only to the whole territory, but also to the *potentially most productive land*. The *potentially most productive land* is defined by exclusion of all spaces with slope higher than 10%, woods, protected areas, internal water bodies, rocky mountains or glaciers (in green color). In so doing, it proposes a view on how balanced/unbalanced is the relationship between built areas and the surrounding landscape.

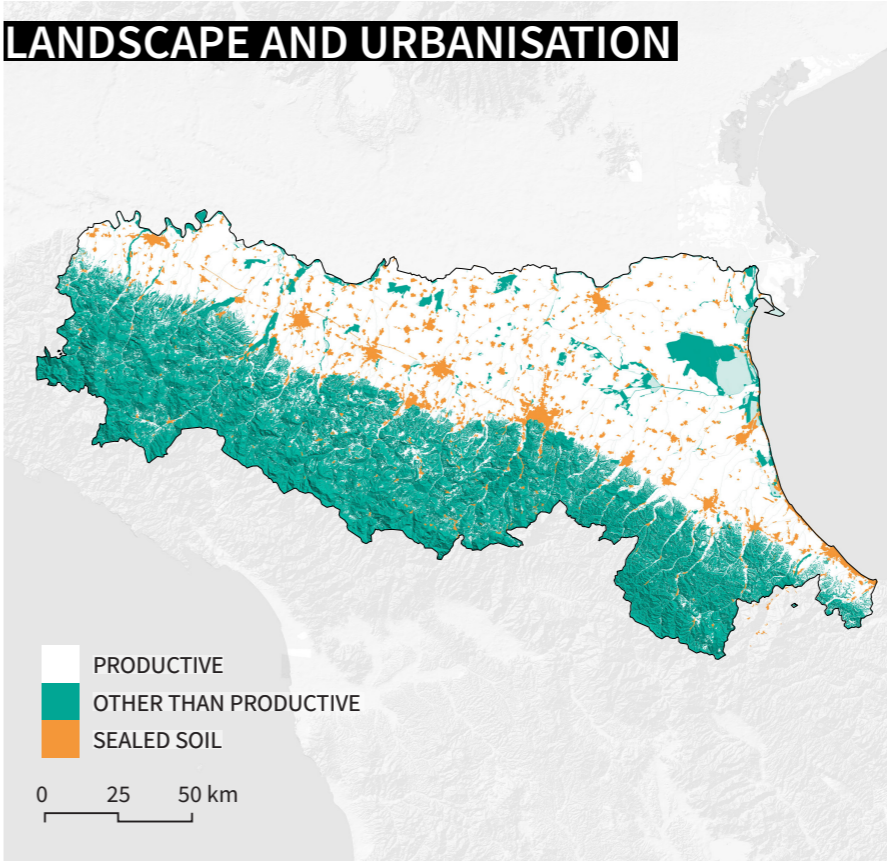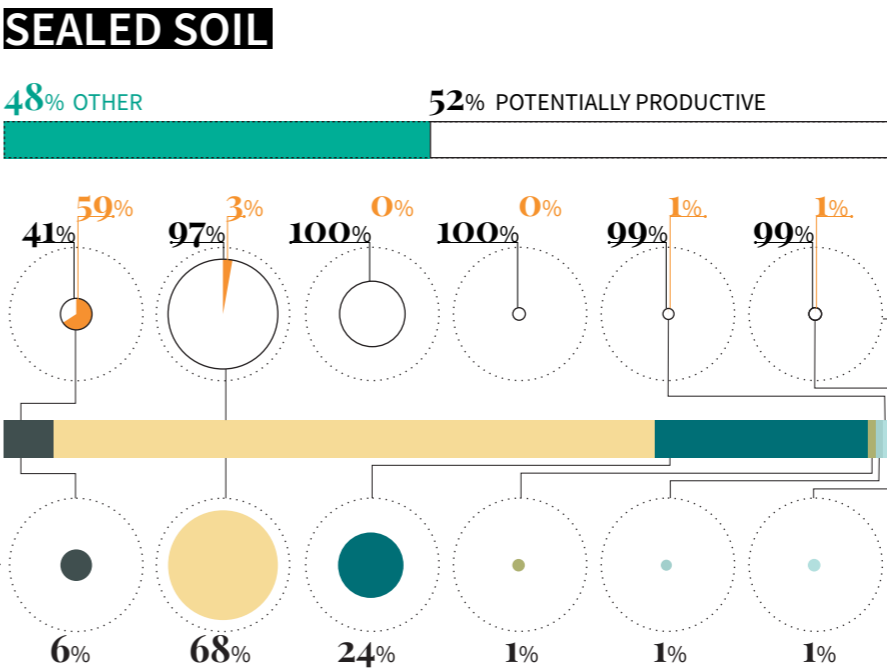

## CLIMATE

### PRECIPITATION [mm]

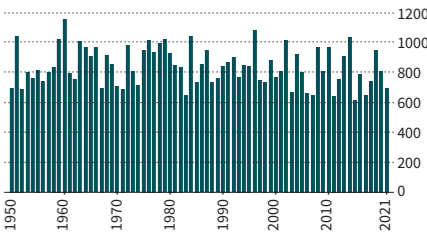

### ANNUAL TEMPERATURE [C°]

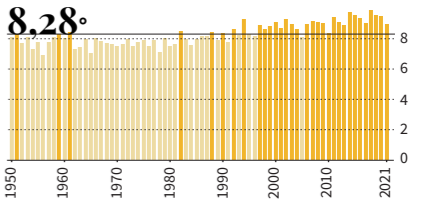

MIN

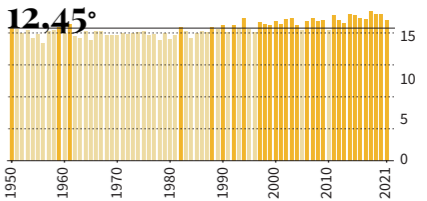

MED

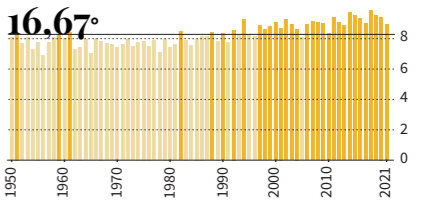

MAX

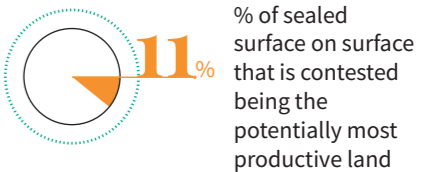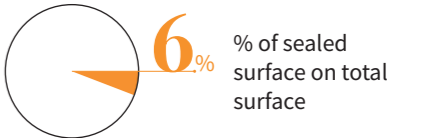

**ECOSYSTEMS**

The presented ecosystem's classification was defined according to the "Mapping and Assessment of Ecosystem and their Services: an EU ecosystem assessment" edited by the European Union Joint Research Centre (JRC) in 2020.

# Population density and distribution

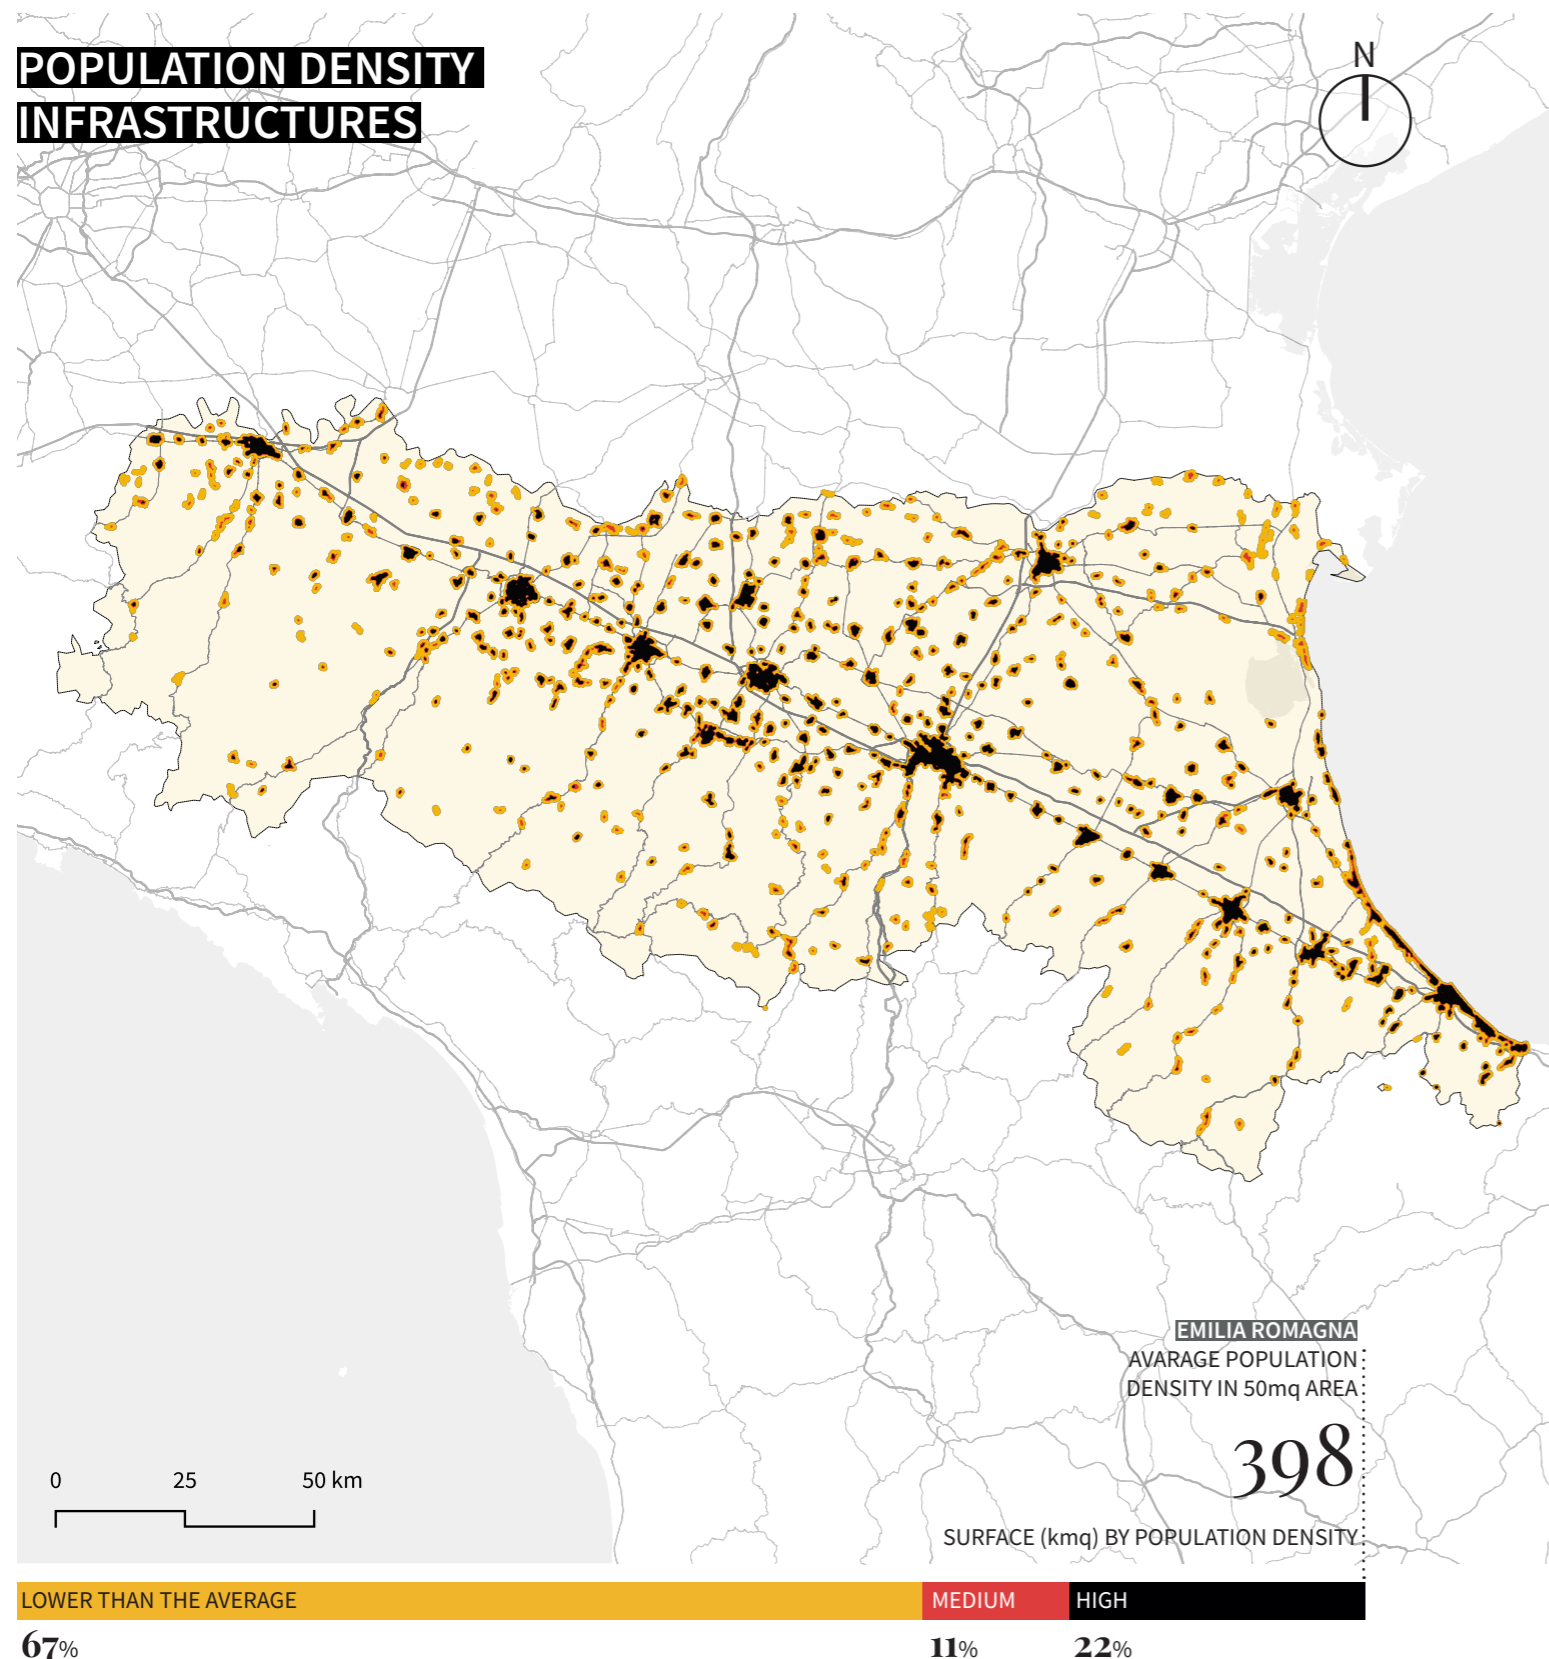

## POPULATION

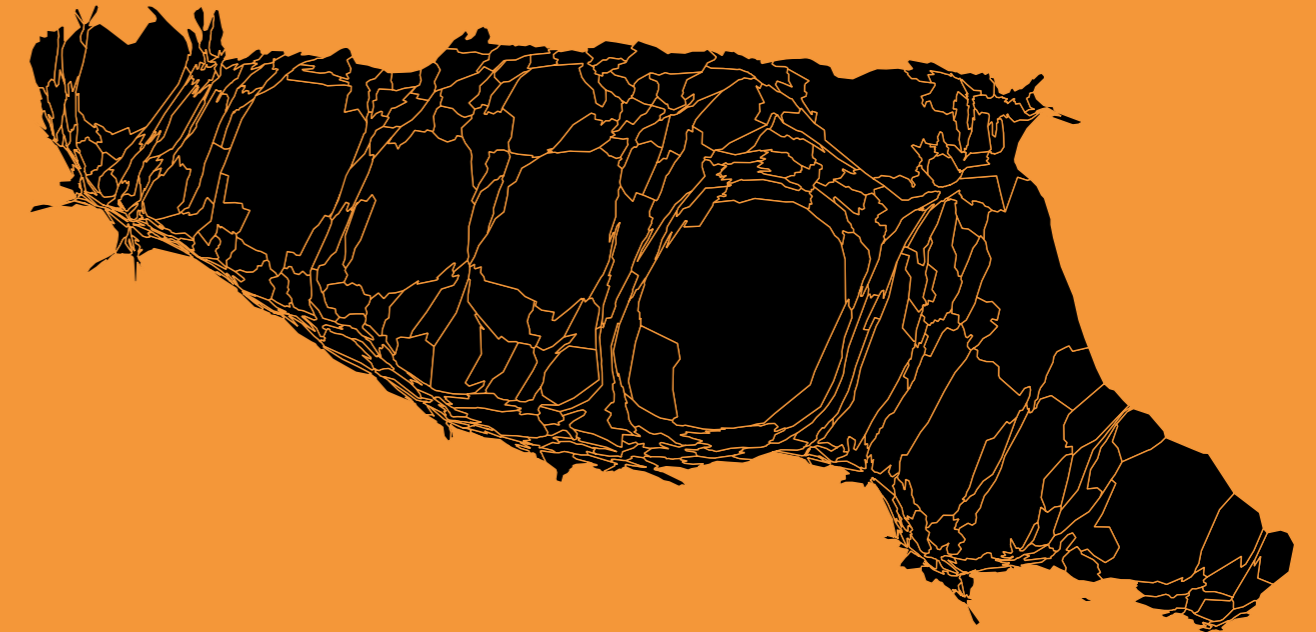

This is a thematic distorted map based on population data, (number of inhabitants per Local Administrative Unit in 2020 as provided by Eurostat). Within this anamorphic maps the Local Administrative Units (as geometric entities that should correspond, in size and shape, to their real world area) are instead distorted by attributing the maximum importance to the following variable: number of inhabitant. Therefore LAU's geographic size are altered proportionally to better visualize the distribution of the population variable: LAU's with an higher number of inhabitants become larger while the less populated ones shrink accordingly.

# Socio-economic data

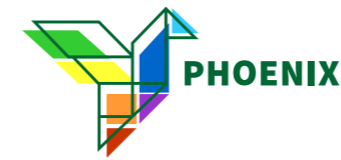

## POPULATION TREND

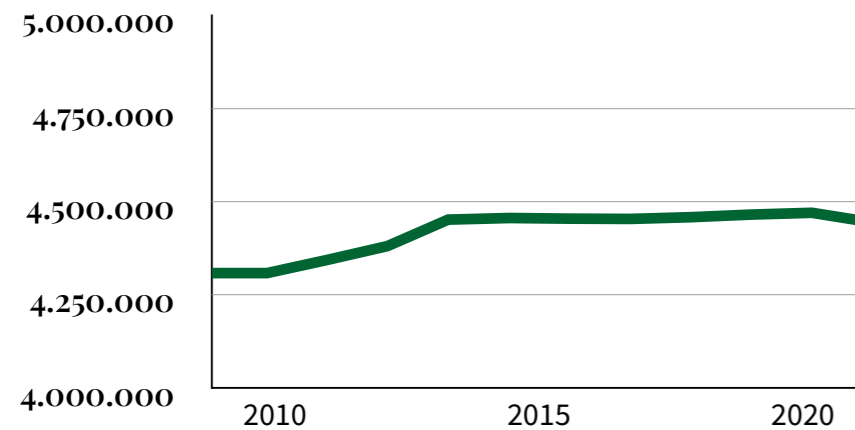

## POPULATION

**4.438.937**

## AVERAGE FAMILY DIMENSION

**2,2**

## LIFE EXPECTANCY\* ITALY

**82 years**

## GDP TOTAL

**149.000** million €

## GDP PER CAPITA

**33.600** €

## GDP BY SECTOR\*

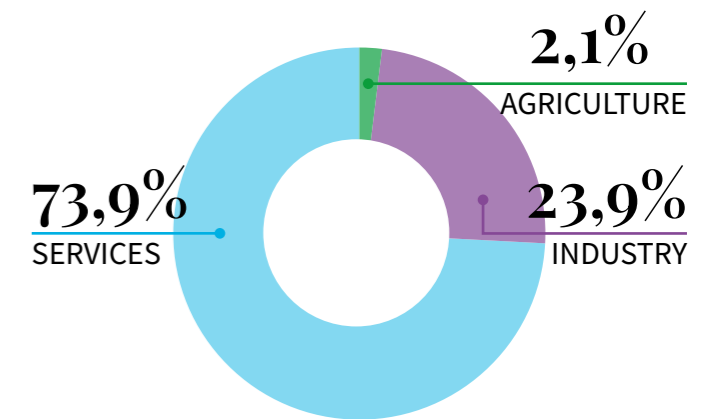

## AGE GROUPS %

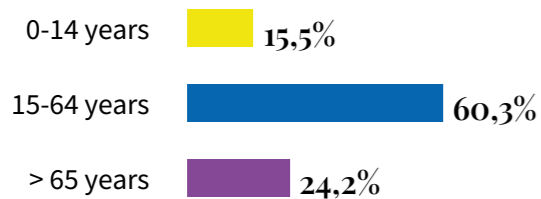

## ACTIVE AGEING INDEX\* ITALY

It measures on a scale between 0 and 100 the level to which older people live independent lives, participate in paid employment and social activities, and their capacity to age actively.

**33,8**

## GINI INDEX\* ITALY

**35,4**

It represents the income inequality within a nation or a social group. It varies between 0 (perfect equality) and 1 (extreme inequality).

## HUMAN DEVELOPMENT INDEX\* ITALY

**0,895**

It is a summary measure of average achievement in key dimensions of human development: a long and healthy life, being knowledgeable and have a decent standard of living.

## CITIZENSHIP\* ITALY

MALES

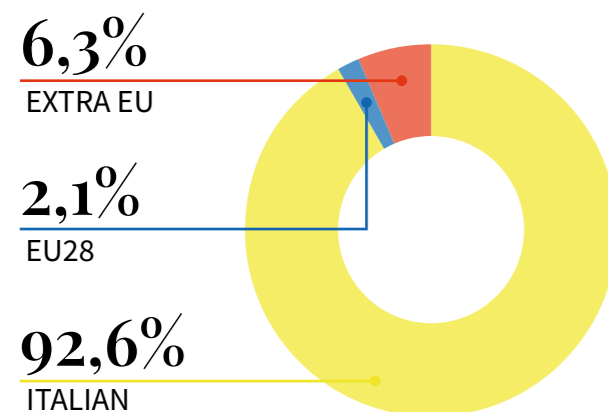

FEMALES

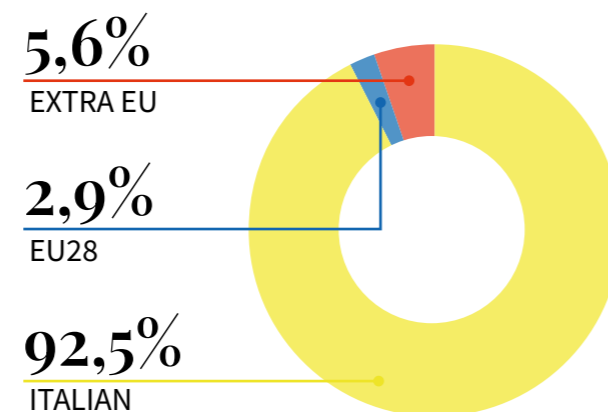

## EDUCATION\* ITALY

MALES

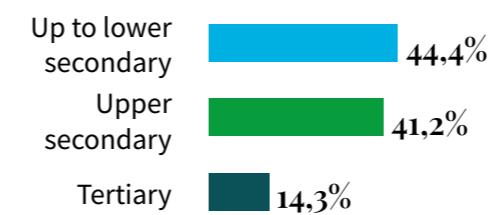

FEMALES

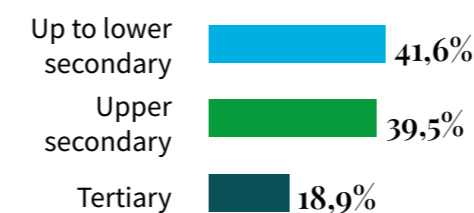

## EMPLOYMENT BY AGE\* ITALY

MALES

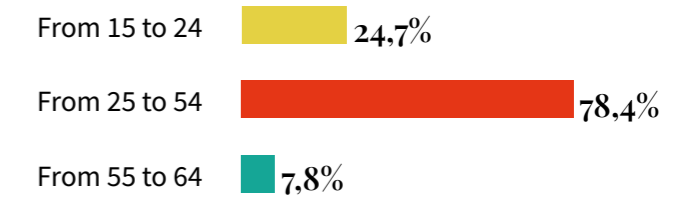

FEMALES

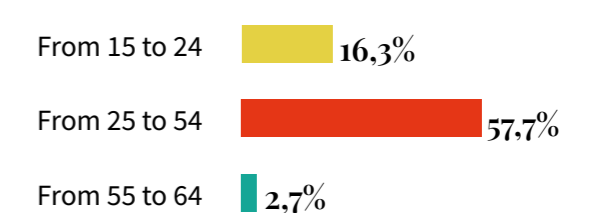

# Emissions and energy data

## GREENHOUSE GAS EMISSIONS BY SOURCE SECTOR\*<sup>ITALY</sup>

tot: 352,7 Mt\*

8,7%

AGRICULTURE

5,0%

WASTE MANAGEMENT

8,3%

INDUSTRY USE

-8,6%

LAND USE, LAND USE CHANGE  
AND FORESTRY

78,8%

FUEL COMBUSTION

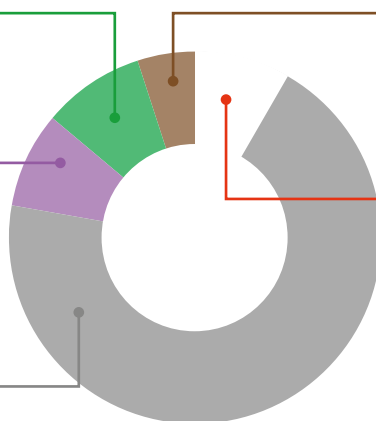

\*Mt: millions of tonnes

## ENERGY CONSUMPTION BY SOURCE SECTOR\*<sup>ITALY</sup>

tot: 103.057 ktoe\*

2,87%

AGRICULTURE, FORESTRY AND  
FISHING

0,04%

NOT ELSEWHERE SPECIFIED

29,75%

HOUSEHOLDS

23,15%

INDUSTRY USE

16,07%

COMMERCIAL AND PUBLIC SECTOR

23,15%

TRANSPORT SECTOR

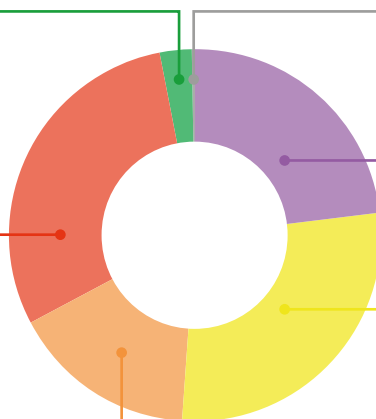

\*ktoe: thousands of tonnes of equivalent oil

## SHARE OF ENERGY BY SOURCES\*<sup>ITALY</sup>

Renewables 20,4%

Fossil 77,7%

Other 1,9%

## SHARE OF RENEWABLE SOURCES\*<sup>ITALY</sup>

Transport 11%

Electricity 38%

Heating/cooling 20%
